# Supplementary material for: Mixed quantum/classical theory for rotational energy exchange in symmetric-top-rotor + linear-rotor collisions and a case study of the ND3 + D2 system
Source: Royal Society of Chemistry journal article supplement (doi:10.1039/d3cp01642k), 2023-01-01
Supplement: d3cp01642k1.pdf [file d3cp01642k1.pdf]

Supplemental Information for:

**“Mixed Quantum/Classical Theory for Rotational Energy Exchange  
in Symmetric-Top-Rotor + Linear-Rotor Collisions  
and a Case Study of ND<sub>3</sub> + D<sub>2</sub> System”**

by Carolin Joy, Bikramaditya Mandal, Dulat Bostan, and Dmitri Babikov\*

Chemistry Department, Marquette University, Milwaukee, Wisconsin 53201-1881, USA

**1. The derivation of expression for transition matrix elements, Eq. (14) in the main text**

The wavefunction that describes the motion of the symmetric top + diatom can be expressed analytically as:

$$\Psi_{nm}(\Lambda_1, \Lambda_2) = \sqrt{\frac{2j_1 + 1}{8\pi^2}} \sqrt{\frac{1}{2(1 + \delta_{k_1,0})}} \times \sum_{m_1=-j_1}^{+j_1} C_{j_1, m_1}^{j_1, m} C_{j_2, m-m_1}^{j_2, m} \left[ D_{m_1, k_1}^{j_1*}(\Lambda_1) + \epsilon D_{m_1, -k_1}^{j_1*}(\Lambda_1) \right] Y_{m-m_1}^{j_2}(\Lambda_2) \quad (S1)$$

The multidimensional potential can be expanded over a set of suitable angular functions

$\tau_{\lambda_1 \mu_1 \lambda_2 \lambda}(\Lambda_1, \Lambda_2)$  with expansion coefficients  $v_{\lambda_1 \mu_1 \lambda_2 \lambda}(R)$  computed by numerical quadrature.

$$V(R, \Lambda_1, \Lambda_2) = \sum_{\lambda_1 \mu_1 \lambda_2 \lambda} v_{\lambda_1 \mu_1 \lambda_2 \lambda}(R) \times \tau_{\lambda_1 \mu_1 \lambda_2 \lambda}(\Lambda_1, \Lambda_2) \quad (S2)$$

where,

$$\tau_{\lambda_1 \mu_1 \lambda_2 \lambda}(\Lambda_1, \Lambda_2) = \sqrt{\frac{2\lambda_1 + 1}{4\pi}} \sum_{\eta=-\min(\lambda_1, \lambda_2)}^{+\min(\lambda_1, \lambda_2)} C_{\lambda_1, \eta, \lambda_2, -\eta}^{\lambda_1, 0} \left[ D_{\eta, \mu_1}^{\lambda_1*}(\Lambda_1) + (-1)^{\lambda_1 + \mu_1 + \lambda_2 + \lambda} D_{\eta, -\mu_1}^{\lambda_1*}(\Lambda_1) \right] Y_{-\eta}^{\lambda_2}(\Lambda_2) \quad (S3)$$

The potential coupling matrix  $M_n^{\prime\prime}(R)$  can be expressed as follows:

$$M_n^{\prime\prime}(R) = \left\langle \Psi_{n m}^{\prime\prime}(\Lambda_1, \Lambda_2) \left| V(R, \Lambda_1, \Lambda_2) \right| \Psi_{n m}^{\prime}(\Lambda_1, \Lambda_2) \right\rangle \quad (S4)$$

Here  $\Psi_{n m}^{\prime\prime}(\Lambda_1, \Lambda_2)$  and  $\Psi_{n m}^{\prime}(\Lambda_1, \Lambda_2)$  represents wavefunctions of final and initial states of the molecule.

\* Author to whom all correspondence should be addressed; electronic mail: [dmitri.babikov@mu.edu](mailto:dmitri.babikov@mu.edu)

To compute state-to-state matrix elements we have to substitute Eq. (S2) into Eq. (S3), followed by the substitution of Eqs. (S1-S2) on to as Eq. (S4) :

$$\begin{aligned}
& \langle \Psi_{n''m''}(\Lambda_1, \Lambda_2) | V(R, \Lambda_1, \Lambda_2) | \Psi_{n'm'}(\Lambda_1, \Lambda_2) \rangle = \\
& = \sqrt{\frac{2j_1''+1}{8\pi^2}} \sqrt{\frac{1}{2(1+\delta_{k_1,0}'')}} \sqrt{\frac{2j_1'+1}{8\pi^2}} \sqrt{\frac{1}{2(1+\delta_{k_1,0}')}} \sum_{m_1=-j_1'}^{+j_1'} C_{j_1', m_1, j_2', m-m_1}^{j_1', m} \sum_{m_1''=-j_1''}^{+j_1''} C_{j_1'', m_1'', j_2'', m-m_1''}^{j_1'', m} \\
& \times \sum_{\lambda_1 \mu_1 \lambda_2 \lambda} v_{\lambda_1 \mu_1 \lambda_2 \lambda}(R) \sqrt{\frac{2\lambda_1+1}{4\pi}} \sum_{\eta=-\min(\lambda_1, \lambda_2)}^{+\min(\lambda_1, \lambda_2)} C_{\lambda_1, \eta, \lambda_2, -\eta}^{\lambda, 0} \left\langle Y_{m-m_1}^{j_2''}(\Lambda_2) \left| Y_{-\eta}^{\lambda_2}(\Lambda_2) \right| Y_{m-m_1}^{j_2'}(\Lambda_2) \right\rangle \\
& \times \left[ \begin{aligned}
& \left\langle D_{m_1, k_1}^{j_1''*}(\Lambda_1) \left| D_{\eta, \mu_1}^{\lambda_1*}(\Lambda_1) \right| D_{m_1, k_1}^{j_1'}(\Lambda_1) \right\rangle + (-1)^{\lambda_1 + \mu_1 + \lambda_2 + \lambda} \left\langle D_{m_1, k_1}^{j_1''*}(\Lambda_1) \right. \\
& + \epsilon' \left\langle D_{m_1, k_1}^{j_1''*}(\Lambda_1) \left| D_{\eta, \mu_1}^{\lambda_1*}(\Lambda_1) \right| D_{m_1, -k_1}^{j_1'}(\Lambda_1) \right\rangle + (-1)^{\lambda_1 + \mu_1 + \lambda_2 + \lambda} \left\langle D_{m_1, k_1}^{j_1''*}(\Lambda_1) \right. \\
& + \epsilon'' \left\langle D_{m_1, -k_1}^{j_1''*}(\Lambda_1) \left| D_{\eta, \mu_1}^{\lambda_1*}(\Lambda_1) \right| D_{m_1, k_1}^{j_1'}(\Lambda_1) \right\rangle + (-1)^{\lambda_1 + \mu_1 + \lambda_2 + \lambda} \left\langle D_{m_1, -k_1}^{j_1''*}(\Lambda_1) \right. \\
& \left. + \epsilon' \epsilon'' \left\langle D_{m_1, -k_1}^{j_1''*}(\Lambda_1) \left| D_{\eta, \mu_1}^{\lambda_1*}(\Lambda_1) \right| D_{m_1, -k_1}^{j_1'}(\Lambda_1) \right\rangle + (-1)^{\lambda_1 + \mu_1 + \lambda_2 + \lambda} \left\langle D_{m_1, -k_1}^{j_1''*}(\Lambda_1) \right.
\end{aligned} \right]
\end{aligned}$$

For the integrals of spherical harmonics, the following equality can be employed [1]:

$$\langle Y_{m_3}^{l_3} | Y_{m_2}^{l_2} | Y_{m_1}^{l_1} \rangle = \sqrt{\frac{(2l_1+1)(2l_2+1)}{4\pi(2l_3+1)}} C_{l_1, 0, l_2, 0}^{l_3, 0} C_{l_1, m_1, l_2, m_2}^{l_3, m_3} \quad (S5)$$

For the integrals of Wigner D-functions, the following equality can be employed [1]:

$$\langle D_{m_3 m_3}^{l_3*} | D_{m_2 m_2}^{l_2*} | D_{m_1 m_1}^{l_1*} \rangle = \frac{8\pi^2}{2l_3+1} C_{l_1, m_1, l_2, m_2}^{l_3, m_3} C_{l_1, m_1, l_2, m_2}^{l_3, m_3} \quad (S6)$$

With these, we have:

$$\begin{aligned}
M_n^{\prime\prime}(R) &= \sqrt{\frac{2j_1^{\prime\prime}+1}{8\pi^2}} \sqrt{\frac{1}{2(1+\delta_{k_1,0}^{\prime\prime})}} \sqrt{\frac{2j_1^{\prime}+1}{8\pi^2}} \sqrt{\frac{1}{2(1+\delta_{k_1,0}^{\prime})}} \sum_{m_1=-j_1^{\prime}}^{+j_1^{\prime}} C_{j_1^{\prime}, m_1^{\prime}, j_2^{\prime}, m-m_1^{\prime}}^{j_1^{\prime}, m} \sum_{m_1=-j_1^{\prime\prime}}^{+j_1^{\prime\prime}} C_{j_1^{\prime\prime}, m_1^{\prime\prime}, j_2^{\prime\prime}, m-m_1^{\prime\prime}}^{j_1^{\prime\prime}, m} \\
&\times \sum_{\lambda_1 \mu_1 \lambda_2 \lambda} v_{\lambda_1 \mu_1 \lambda_2 \lambda}(R) \sqrt{\frac{2\lambda_1+1}{4\pi}} \sum_{\eta=-\min(\lambda_1, \lambda_2)}^{+\min(\lambda_1, \lambda_2)} C_{\lambda_1, \eta, \lambda_2, -\eta}^{\lambda, 0} \sqrt{\frac{(2j_2^{\prime}+1)(2\lambda_2+1)}{4\pi(2j_2^{\prime\prime}+1)}} C_{j_2^{\prime}, 0, \lambda_2, 0}^{j_2^{\prime}, 0} C_{j_2^{\prime\prime}, m-m_1^{\prime}, \lambda_2, -\eta}^{j_2^{\prime\prime}, m-m_1^{\prime}} \\
&\times \frac{8\pi^2}{2j_1^{\prime\prime}+1} C_{j_1^{\prime\prime}, m_1^{\prime\prime}, \lambda_1, \eta}^{j_1^{\prime\prime}, m_1^{\prime\prime}} \left[ \begin{aligned} &+ \epsilon' \begin{pmatrix} C_{j_1^{\prime}, k_1^{\prime}, \lambda_1, \mu_1}^{j_1^{\prime}, k_1^{\prime}} + (-1)^{\lambda_1 + \mu_1 + \lambda_2 + \lambda} C_{j_1^{\prime}, k_1^{\prime}, \lambda_1, -\mu_1}^{j_1^{\prime}, k_1^{\prime}} \\ C_{j_1^{\prime}, -k_1^{\prime}, \lambda_1, \mu_1}^{j_1^{\prime}, k_1^{\prime}} + (-1)^{\lambda_1 + \mu_1 + \lambda_2 + \lambda} C_{j_1^{\prime}, -k_1^{\prime}, \lambda_1, -\mu_1}^{j_1^{\prime}, k_1^{\prime}} \end{pmatrix} \\ &+ \epsilon'' \begin{pmatrix} C_{j_1^{\prime}, k_1^{\prime}, \lambda_1, \mu_1}^{j_1^{\prime}, -k_1^{\prime}} + (-1)^{\lambda_1 + \mu_1 + \lambda_2 + \lambda} C_{j_1^{\prime}, k_1^{\prime}, \lambda_1, -\mu_1}^{j_1^{\prime}, -k_1^{\prime}} \\ C_{j_1^{\prime}, k_1^{\prime}, \lambda_1, \mu_1}^{j_1^{\prime}, -k_1^{\prime}} + (-1)^{\lambda_1 + \mu_1 + \lambda_2 + \lambda} C_{j_1^{\prime}, k_1^{\prime}, \lambda_1, -\mu_1}^{j_1^{\prime}, -k_1^{\prime}} \end{pmatrix} \\ &+ \epsilon' \epsilon'' \begin{pmatrix} C_{j_1^{\prime}, -k_1^{\prime}, \lambda_1, \mu_1}^{j_1^{\prime}, -k_1^{\prime}} + (-1)^{\lambda_1 + \mu_1 + \lambda_2 + \lambda} C_{j_1^{\prime}, -k_1^{\prime}, \lambda_1, -\mu_1}^{j_1^{\prime}, -k_1^{\prime}} \\ C_{j_1^{\prime}, -k_1^{\prime}, \lambda_1, \mu_1}^{j_1^{\prime}, -k_1^{\prime}} + (-1)^{\lambda_1 + \mu_1 + \lambda_2 + \lambda} C_{j_1^{\prime}, -k_1^{\prime}, \lambda_1, -\mu_1}^{j_1^{\prime}, -k_1^{\prime}} \end{pmatrix} \end{aligned} \right]
\end{aligned}$$

On further simplification we obtain,

$$\begin{aligned}
M_n^{\prime\prime} &= \sqrt{\frac{2j_1^{\prime}+1}{2j_1^{\prime\prime}+1}} \sqrt{\frac{2j_2^{\prime}+1}{2j_2^{\prime\prime}+1}} \sqrt{\frac{1}{2(1+\delta_{k_1,0}^{\prime})2(1+\delta_{k_1,0}^{\prime\prime})}} \sum_{\lambda_1 \mu_1 \lambda_2 \lambda} v_{\lambda_1 \mu_1 \lambda_2 \lambda}(R) \sqrt{\frac{2\lambda_1+1}{4\pi}} \sqrt{\frac{2\lambda_2+1}{4\pi}} \\
&\times C_{j_2^{\prime}, 0, \lambda_2, 0}^{j_2^{\prime}, 0} \sum_{m_1=-j_1^{\prime}}^{+j_1^{\prime}} C_{j_1^{\prime}, m_1^{\prime}, j_2^{\prime}, m-m_1^{\prime}}^{j_1^{\prime}, m} \sum_{m_1=-j_1^{\prime\prime}}^{+j_1^{\prime\prime}} C_{j_1^{\prime\prime}, m_1^{\prime\prime}, j_2^{\prime\prime}, m-m_1^{\prime\prime}}^{j_1^{\prime\prime}, m} \sum_{\eta=-\min(\lambda_1, \lambda_2)}^{+\min(\lambda_1, \lambda_2)} C_{\lambda_1, \eta, \lambda_2, -\eta}^{\lambda, 0} C_{j_2^{\prime}, m-m_1^{\prime}, \lambda_2, -\eta}^{j_2^{\prime}, m-m_1^{\prime}} C_{j_1^{\prime}, m_1^{\prime}, \lambda_1, \eta}^{j_1^{\prime}, m_1^{\prime}} \\
&\times \left[ \begin{aligned} &\begin{pmatrix} C_{j_1^{\prime}, k_1^{\prime}, \lambda_1, \mu_1}^{j_1^{\prime}, k_1^{\prime}} + (-1)^{\lambda_1 + \mu_1 + \lambda_2 + \lambda} C_{j_1^{\prime}, k_1^{\prime}, \lambda_1, -\mu_1}^{j_1^{\prime}, k_1^{\prime}} \\ C_{j_1^{\prime}, -k_1^{\prime}, \lambda_1, \mu_1}^{j_1^{\prime}, k_1^{\prime}} + (-1)^{\lambda_1 + \mu_1 + \lambda_2 + \lambda} C_{j_1^{\prime}, -k_1^{\prime}, \lambda_1, -\mu_1}^{j_1^{\prime}, k_1^{\prime}} \end{pmatrix} \\ &+ \epsilon' \begin{pmatrix} C_{j_1^{\prime}, k_1^{\prime}, \lambda_1, \mu_1}^{j_1^{\prime}, k_1^{\prime}} + (-1)^{\lambda_1 + \mu_1 + \lambda_2 + \lambda} C_{j_1^{\prime}, k_1^{\prime}, \lambda_1, -\mu_1}^{j_1^{\prime}, k_1^{\prime}} \\ C_{j_1^{\prime}, -k_1^{\prime}, \lambda_1, \mu_1}^{j_1^{\prime}, k_1^{\prime}} + (-1)^{\lambda_1 + \mu_1 + \lambda_2 + \lambda} C_{j_1^{\prime}, -k_1^{\prime}, \lambda_1, -\mu_1}^{j_1^{\prime}, k_1^{\prime}} \end{pmatrix} \\ &+ \epsilon'' \begin{pmatrix} C_{j_1^{\prime}, k_1^{\prime}, \lambda_1, \mu_1}^{j_1^{\prime}, -k_1^{\prime}} + (-1)^{\lambda_1 + \mu_1 + \lambda_2 + \lambda} C_{j_1^{\prime}, k_1^{\prime}, \lambda_1, -\mu_1}^{j_1^{\prime}, -k_1^{\prime}} \\ C_{j_1^{\prime}, k_1^{\prime}, \lambda_1, \mu_1}^{j_1^{\prime}, -k_1^{\prime}} + (-1)^{\lambda_1 + \mu_1 + \lambda_2 + \lambda} C_{j_1^{\prime}, k_1^{\prime}, \lambda_1, -\mu_1}^{j_1^{\prime}, -k_1^{\prime}} \end{pmatrix} \\ &+ \epsilon' \epsilon'' \begin{pmatrix} C_{j_1^{\prime}, -k_1^{\prime}, \lambda_1, \mu_1}^{j_1^{\prime}, -k_1^{\prime}} + (-1)^{\lambda_1 + \mu_1 + \lambda_2 + \lambda} C_{j_1^{\prime}, -k_1^{\prime}, \lambda_1, -\mu_1}^{j_1^{\prime}, -k_1^{\prime}} \\ C_{j_1^{\prime}, -k_1^{\prime}, \lambda_1, \mu_1}^{j_1^{\prime}, -k_1^{\prime}} + (-1)^{\lambda_1 + \mu_1 + \lambda_2 + \lambda} C_{j_1^{\prime}, -k_1^{\prime}, \lambda_1, -\mu_1}^{j_1^{\prime}, -k_1^{\prime}} \end{pmatrix} \end{aligned} \right]
\end{aligned}$$

In general, Clebsch-Gordan coefficients are non-zero only if  $m = m_1 + m_2$  and

$|j_1 - j_2| \leq j \leq j_1 + j_2$ . Incorporating these properties of CG coefficients [1] we obtain the final state-to-state transition matrix element as follows:

$$\begin{aligned}
M_n'' &= \frac{\sqrt{2j_1' + 1}}{\sqrt{2j_1'' + 1}} \frac{\sqrt{2j_2' + 1}}{\sqrt{2j_2'' + 1}} \sqrt{\frac{1}{2(1 + \delta_{k_1,0}')2(1 + \delta_{k_1,0}'')}} \sum_{\lambda_1 \mu_1 \lambda_2 \lambda} v_{\lambda_1 \mu_1 \lambda_2 \lambda}(R) \sqrt{\frac{2\lambda_1 + 1}{4\pi}} \\
&\times \sqrt{\frac{2\lambda_2 + 1}{4\pi}} C_{j_2', \lambda_2', 0}^{j_2'', 0} \sum_{m_1 = -j_1'}^{+j_1'} C_{j_1', m_1', j_2', m - m_1'}^{j_1', m} \sum_{\eta = -\min(\lambda_1, \lambda_2)}^{+\min(\lambda_1, \lambda_2)} C_{j_1', m_1' - \eta, j_2', m - (m_1' - \eta)}^{j_1'', m} C_{\lambda_1', \eta, \lambda_2', -\eta}^{\lambda_1, 0} C_{j_1', m_1' - \eta, \lambda_1', \eta}^{j_1'', m_1'} \\
&\times C_{j_2', m - (m_1' - \eta), \lambda_2', -\eta}^{j_2'', m - m_1'} \left[ \begin{aligned}
&+ \epsilon' \left( C_{j_1', k_1', \lambda_1', \mu_1'}^{j_1', k_1'} + (-1)^{\lambda_1 + \mu_1 + \lambda_2 + \lambda} C_{j_1', k_1', \lambda_1', -\mu_1'}^{j_1'', k_1'} \right) \\
&+ \epsilon'' \left( C_{j_1', -k_1', \lambda_1', \mu_1'}^{j_1', k_1'} + (-1)^{\lambda_1 + \mu_1 + \lambda_2 + \lambda} C_{j_1', -k_1', \lambda_1', -\mu_1'}^{j_1'', k_1'} \right) \\
&+ \epsilon''' \left( C_{j_1', k_1', \lambda_1', \mu_1'}^{j_1', -k_1'} + (-1)^{\lambda_1 + \mu_1 + \lambda_2 + \lambda} C_{j_1', k_1', \lambda_1', -\mu_1'}^{j_1'', -k_1'} \right) \\
&+ \epsilon'''' \left( C_{j_1', -k_1', \lambda_1', \mu_1'}^{j_1', -k_1'} + (-1)^{\lambda_1 + \mu_1 + \lambda_2 + \lambda} C_{j_1', -k_1', \lambda_1', -\mu_1'}^{j_1'', -k_1'} \right)
\end{aligned} \right]
\end{aligned}$$

## 2. Additional figures for publication

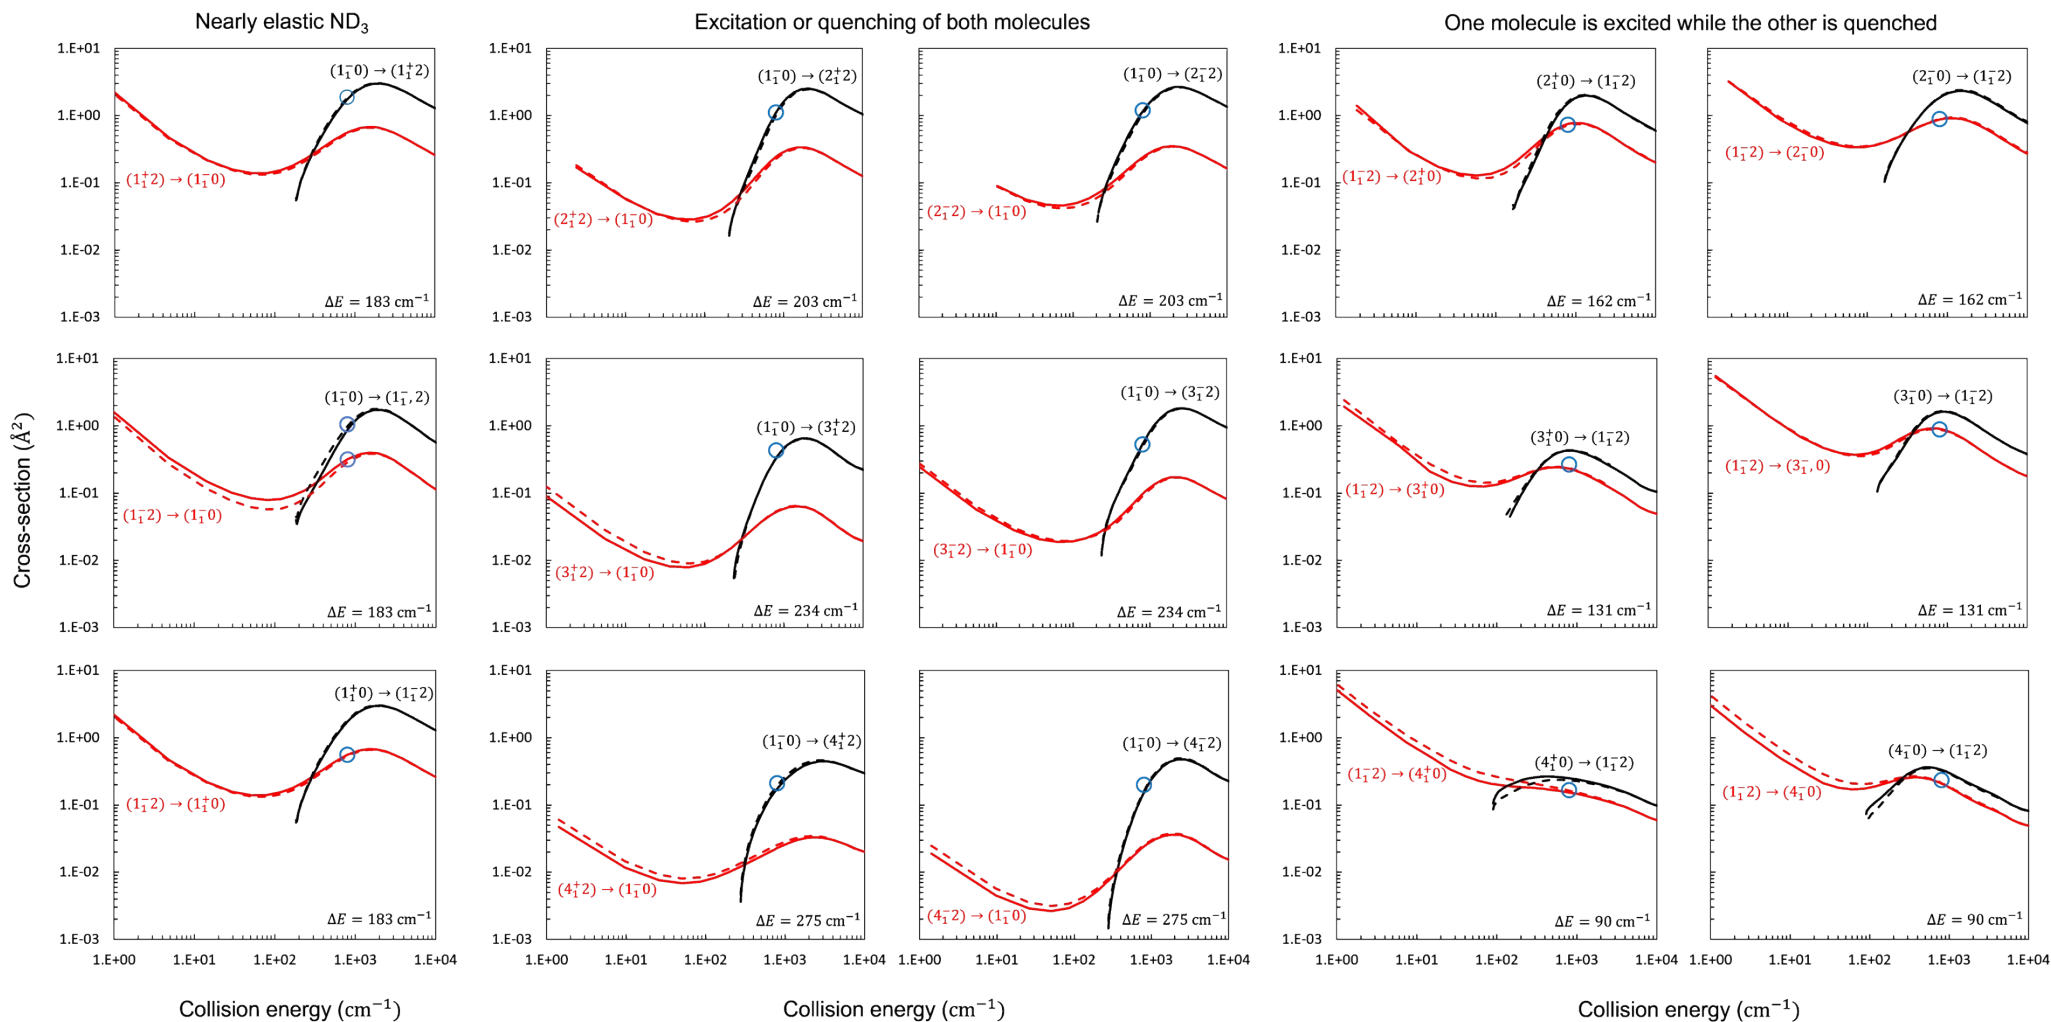

**Figure S1:** The test of microscopic reversibility for transitions between several rotational states of ND<sub>3</sub> + D<sub>2</sub> system, labeled as  $(j_1^{\pm} k j_2)$ . Cross sections are plotted as a function of collision energy. The data obtained by “direct” MQCT calculations are shown by solid lines, whereas dashed lines represent the results of “reverse” calculations. Red color is used for quenching processes, black color is for excitation processes. Blue symbol indicates full-quantum results of Ref. [2].

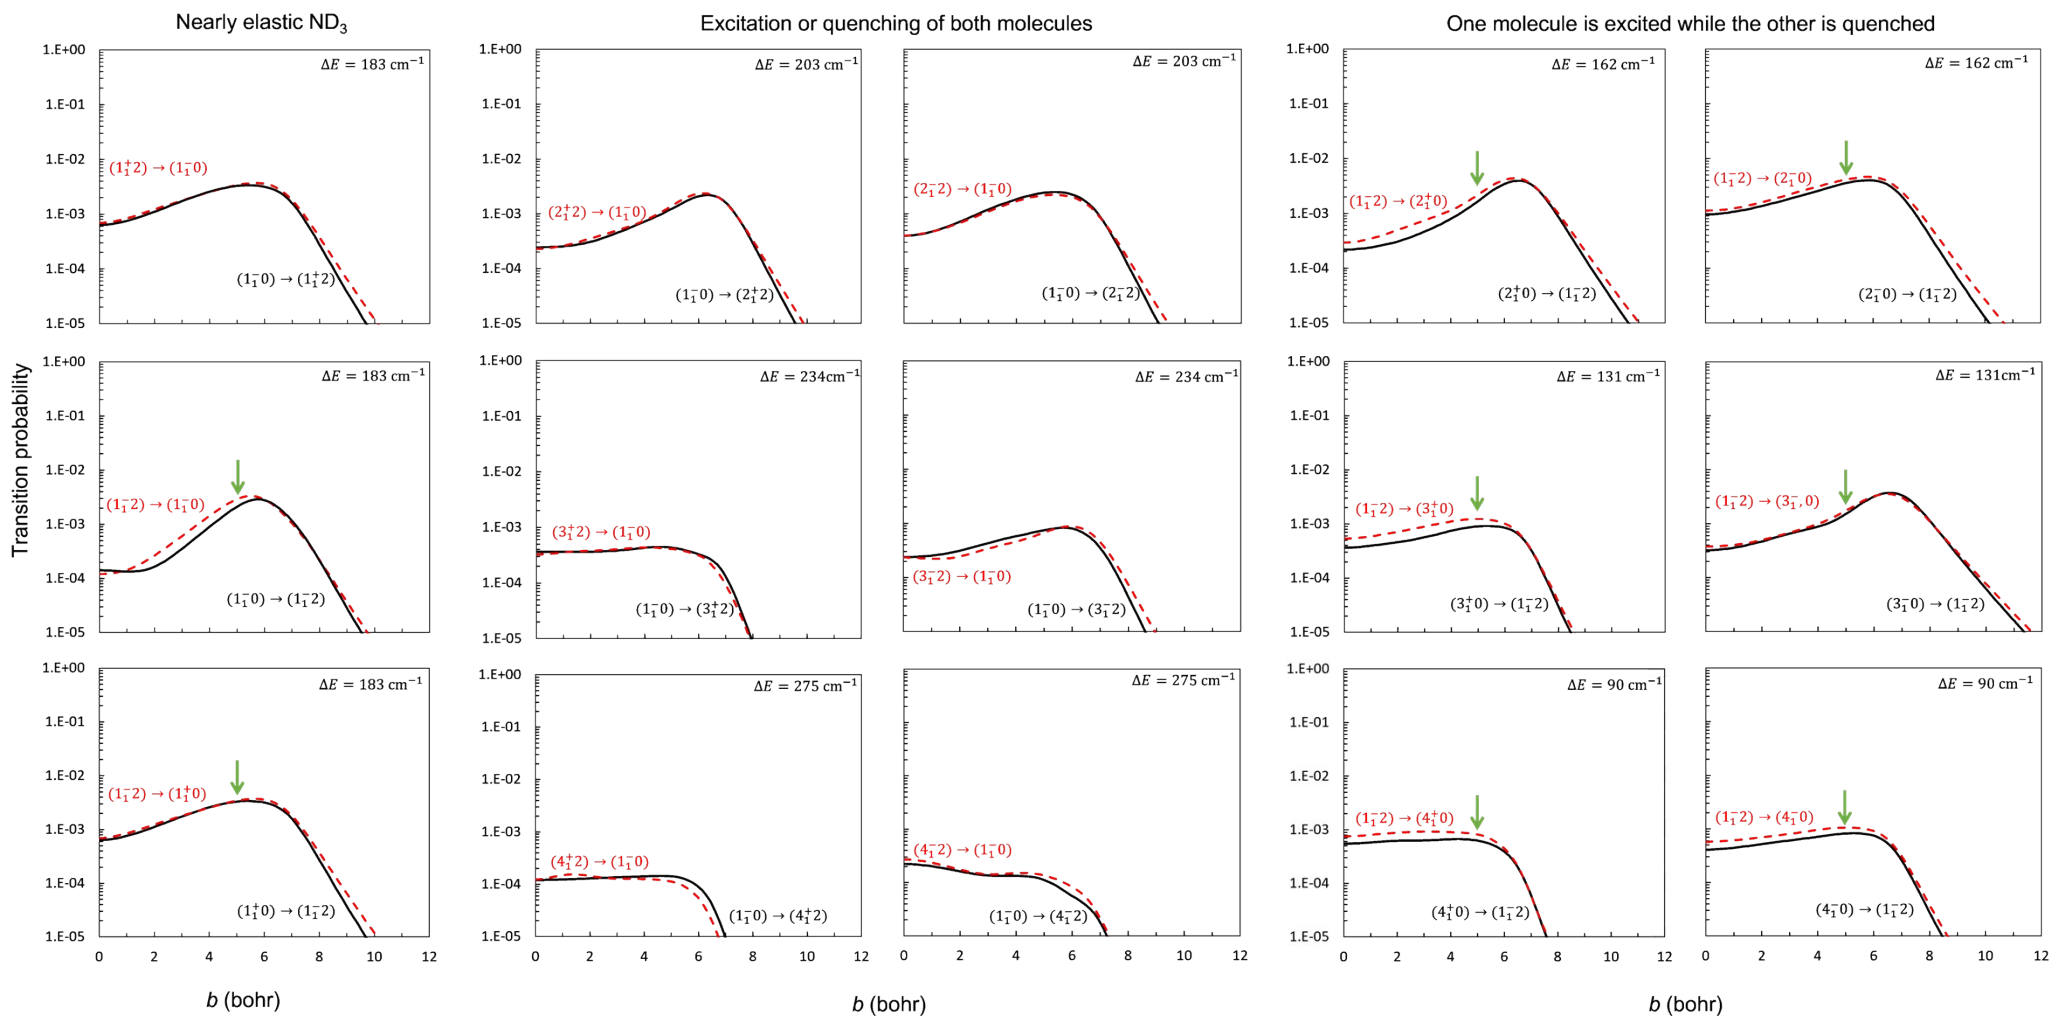

**Figure S2:** Opacity functions for several transitions between the rotational states of  $\text{ND}_3 + \text{D}_2$  system, labeled as  $(j_1 \pm k j_2)$ . Transition probabilities are plotted as a function of collision impact parameter. Collision energy is  $800 \text{ cm}^{-1}$ . Red color is used for quenching processes, black color is for excitation processes. The value of energy difference is given for each transition. Green arrows indicate the value of impact parameter chosen for time-dependent analysis in Fig. 4 of the main text.

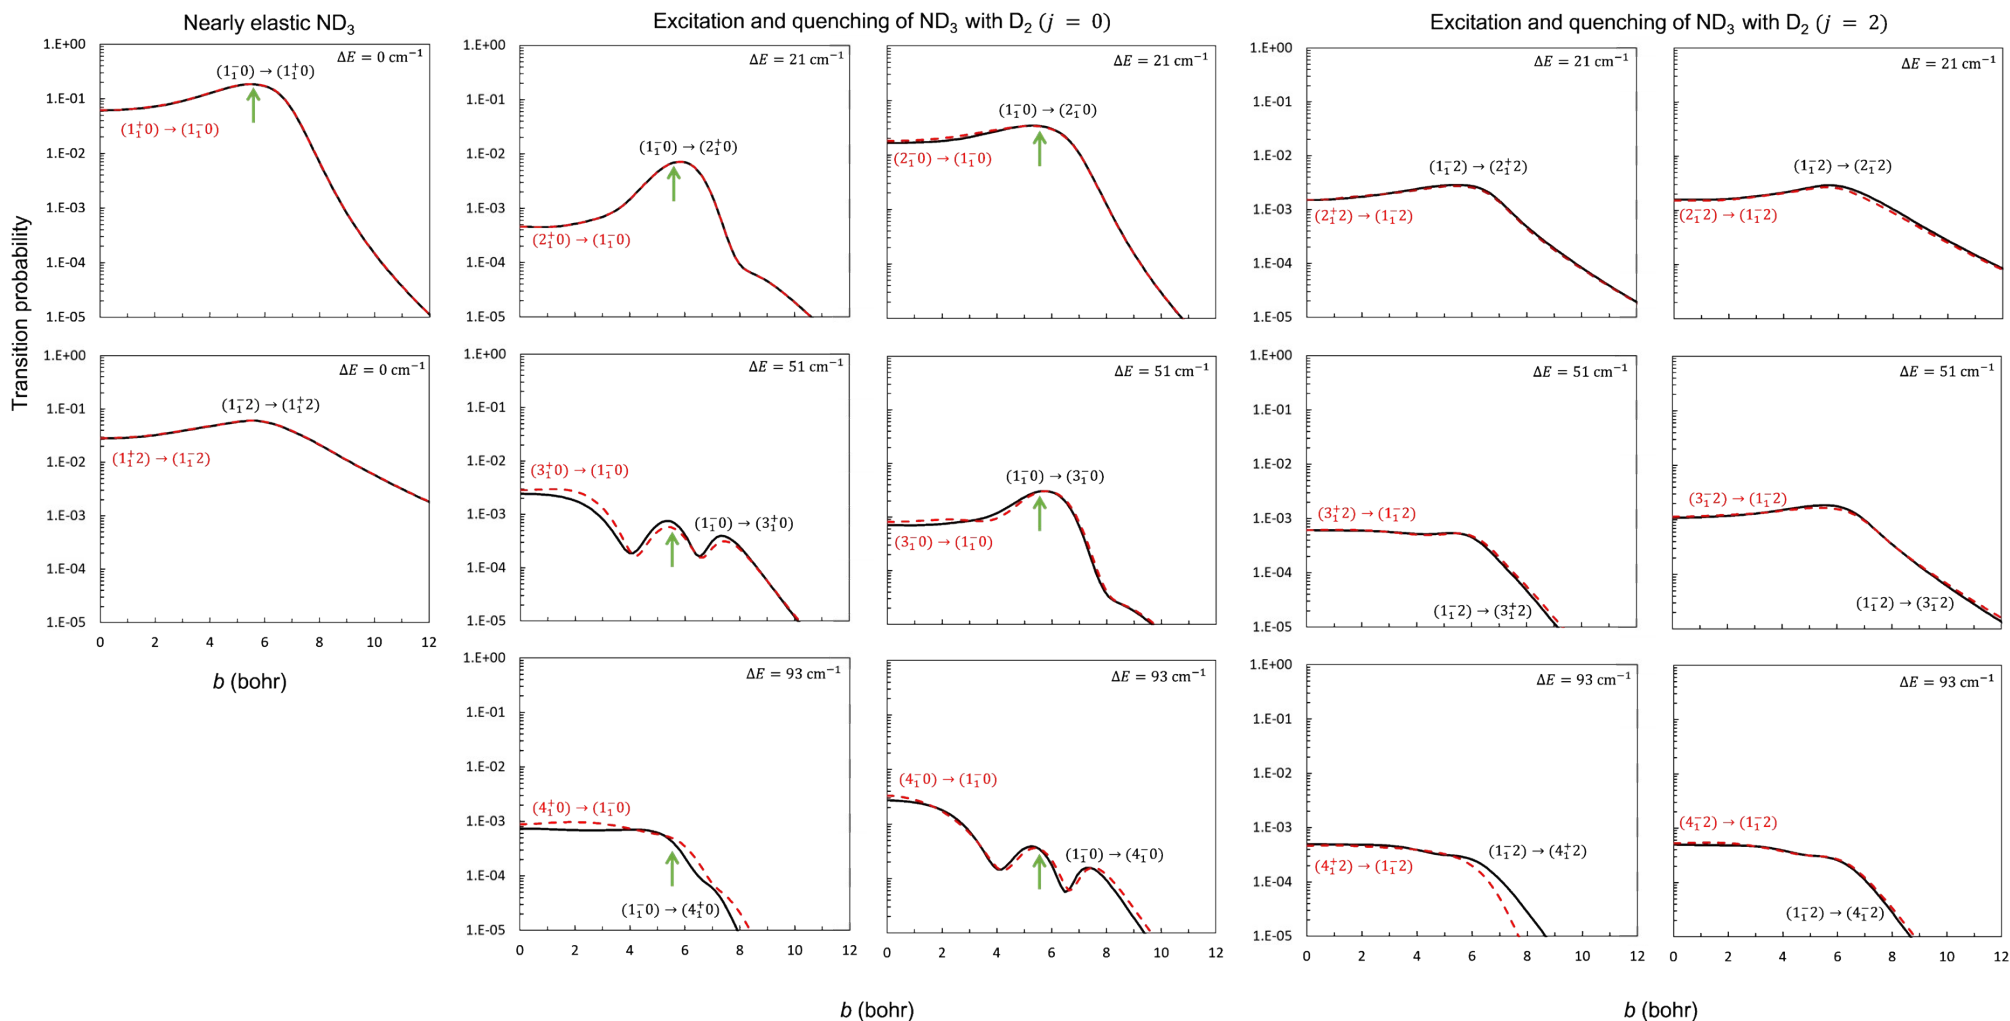

**Figure S3:** Opacity functions for several transitions between the rotational states of  $\text{ND}_3 + \text{D}_2$  system, labeled as  $(j_1 \pm k j_2)$  with  $\text{D}_2$  ( $j_2 = 0$  or  $j_2 = 2$ ). Transition probabilities are plotted as a function of collision impact parameter. Collision energy is  $800 \text{ cm}^{-1}$ . Red color is used for quenching processes, black color is for excitation processes. The value of energy difference is given for each transition. Green arrows indicate the value of impact parameter chosen for time-dependent analysis in Fig. 3 of the main text.

**Table S1:** Assignments of total  $(j,m)$ -components for all transitions discussed in this work in terms of potential coupling and Coriolis coupling. PD is for potential-driven transitions indicated by ✓ mark. If potential coupling is zero (× mark) the transition is driven only by Coriolis coupling. The fraction of Coriolis-driven components is indicated for each transition by red numbers.

| Transition                                     | j | m | PD | Transition                                     | j | m | PD | Transition                                     | j | m | PD | Transition                                     | j                                                      | m | PD                                                     |   |   |   |
|------------------------------------------------|---|---|----|------------------------------------------------|---|---|----|------------------------------------------------|---|---|----|------------------------------------------------|--------------------------------------------------------|---|--------------------------------------------------------|---|---|---|
| $(1_1^+0) \rightarrow (1_{\bar{1}}^-2)$<br>0/2 | 1 | 0 | ✓  | $(1_{\bar{1}}^-2) \rightarrow (1_1^+0)$<br>5/9 | 1 | 0 | ×  | $(1_{\bar{1}}^-2) \rightarrow (1_1^+2)$<br>0/9 | 1 | 0 | ✓  | $(2_1^+0) \rightarrow (1_{\bar{1}}^-0)$<br>2/3 | 2                                                      | 0 | ×                                                      |   |   |   |
|                                                | 1 | 1 | ✓  |                                                | 1 | 1 | ✓  |                                                | 1 | 1 | ✓  |                                                | 2                                                      | 1 | ✓                                                      | 2 | 1 | ✓ |
| → $(1_{\bar{1}}^-0)$<br>1/2                    | 1 | 0 | ×  |                                                | 2 | 0 | ✓  |                                                | 2 | 0 | ✓  |                                                | 2                                                      | 2 | ×                                                      | 2 | 2 | × |
| $(1_{\bar{1}}^-0) \rightarrow (1_1^+0)$<br>1/2 | 1 | 1 | ✓  |                                                | 2 | 1 | ✓  |                                                | 2 | 1 | ✓  | 2                                              | 1                                                      | ✓ | → $(1_{\bar{1}}^-2)$<br>0/3                            | 2 | 0 | ✓ |
|                                                | 1 | 0 | ×  |                                                | 2 | 2 | ×  |                                                | 2 | 2 | ✓  | 2                                              | 2                                                      | ✓ |                                                        | 2 | 1 | ✓ |
| → $(2_1^+0)$<br>1/2                            | 1 | 0 | ×  |                                                | 3 | 0 | ×  |                                                | 3 | 0 | ✓  | 3                                              | 0                                                      | ✓ | $(2_{\bar{1}}^-0) \rightarrow (1_{\bar{1}}^-0)$<br>1/3 | 2 | 0 | ✓ |
|                                                | 1 | 1 | ✓  |                                                | 3 | 1 | ✓  |                                                | 3 | 1 | ✓  | 3                                              | 1                                                      | ✓ |                                                        | 2 | 1 | ✓ |
| → $(2_{\bar{1}}^-0)$<br>0/2                    | 1 | 0 | ✓  |                                                | 3 | 2 | ×  |                                                | 3 | 2 | ✓  | 3                                              | 2                                                      | ✓ | → $(1_{\bar{1}}^-2)$<br>0/3                            | 2 | 0 | ✓ |
|                                                | 1 | 1 | ✓  |                                                | 3 | 3 | ×  |                                                | 3 | 3 | ✓  | 3                                              | 3                                                      | ✓ |                                                        | 2 | 1 | ✓ |
| → $(3_1^+0)$<br>1/2                            | 1 | 1 | ✓  | 1                                              | 0 | ✓ | 1  | 0                                              | ✓ | 1 | 0  | ✓                                              | $(3_1^+0) \rightarrow (1_{\bar{1}}^-0)$<br>3/4         | 2 | 0                                                      | × |   |   |
|                                                | 1 | 0 | ×  | 1                                              | 1 | ✓ | 1  | 1                                              | ✓ | 1 | 1  | ✓                                              |                                                        | 2 | 0                                                      | ✓ |   |   |
| → $(3_{\bar{1}}^-0)$<br>0/2                    | 1 | 1 | ✓  | 2                                              | 0 | × | 2  | 0                                              | ✓ | 2 | 0  | ✓                                              | → $(1_{\bar{1}}^-2)$<br>0/4                            | 2 | 1                                                      | ✓ |   |   |
|                                                | 1 | 0 | ✓  | 2                                              | 1 | ✓ | 2  | 1                                              | ✓ | 2 | 1  | ✓                                              |                                                        | 2 | 2                                                      | ✓ |   |   |
| → $(4_1^+0)$<br>1/2                            | 1 | 1 | ✓  | 3                                              | 0 | ✓ | 3  | 0                                              | ✓ | 3 | 0  | ✓                                              | $(3_{\bar{1}}^-0) \rightarrow (1_{\bar{1}}^-0)$<br>2/4 | 3 | 0                                                      | × |   |   |
|                                                | 1 | 0 | ×  | 3                                              | 1 | ✓ | 3  | 1                                              | ✓ | 3 | 1  | ✓                                              |                                                        | 3 | 1                                                      | ✓ |   |   |
| → $(4_{\bar{1}}^-0)$<br>0/2                    | 1 | 1 | ✓  | 3                                              | 2 | × | 3  | 2                                              | ✓ | 3 | 2  | ✓                                              | → $(1_{\bar{1}}^-2)$<br>0/4                            | 3 | 2                                                      | × |   |   |
|                                                | 1 | 0 | ✓  | 3                                              | 3 | × | 3  | 3                                              | ✓ | 3 | 3  | ✓                                              |                                                        | 3 | 3                                                      | × |   |   |
| → $(1_1^+2)$<br>0/2                            | 1 | 0 | ✓  | 1                                              | 0 | × | 1  | 0                                              | ✓ | 1 | 0  | ✓                                              | $(3_{\bar{1}}^-0) \rightarrow (1_{\bar{1}}^-0)$<br>2/4 | 3 | 0                                                      | ✓ |   |   |
|                                                | 1 | 1 | ✓  | 1                                              | 1 | ✓ | 1  | 1                                              | ✓ | 1 | 1  | ✓                                              |                                                        | 3 | 1                                                      | ✓ |   |   |
| → $(1_{\bar{1}}^-2)$<br>0/2                    | 1 | 0 | ✓  | 2                                              | 0 | ✓ | 2  | 0                                              | ✓ | 2 | 0  | ✓                                              | → $(1_{\bar{1}}^-2)$<br>0/4                            | 3 | 2                                                      | ✓ |   |   |
|                                                | 1 | 1 | ✓  | 2                                              | 1 | ✓ | 2  | 1                                              | ✓ | 2 | 1  | ✓                                              |                                                        | 3 | 3                                                      | ✓ |   |   |
| → $(2_1^+2)$<br>0/2                            | 1 | 1 | ✓  | 2                                              | 2 | ✓ | 2  | 2                                              | ✓ | 2 | 2  | ✓                                              | $(3_{\bar{1}}^-0) \rightarrow (1_{\bar{1}}^-0)$<br>2/4 | 3 | 0                                                      | ✓ |   |   |
|                                                | 1 | 0 | ✓  | 3                                              | 0 | × | 3  | 0                                              | ✓ | 3 | 0  | ✓                                              |                                                        | 3 | 1                                                      | ✓ |   |   |
| → $(2_{\bar{1}}^-2)$<br>0/2                    | 1 | 1 | ✓  | 3                                              | 1 | ✓ | 3  | 1                                              | ✓ | 3 | 1  | ✓                                              | → $(1_{\bar{1}}^-2)$<br>0/4                            | 3 | 2                                                      | × |   |   |
|                                                | 1 | 0 | ✓  | 3                                              | 2 | ✓ | 3  | 2                                              | ✓ | 3 | 2  | ✓                                              |                                                        | 3 | 3                                                      | × |   |   |
| → $(3_1^+2)$<br>0/2                            | 1 | 1 | ✓  | 3                                              | 3 | × | 3  | 3                                              | ✓ | 3 | 3  | ✓                                              | → $(1_{\bar{1}}^-2)$<br>0/4                            | 3 | 0                                                      | ✓ |   |   |
|                                                | 1 | 0 | ✓  | 1                                              | 0 | ✓ | 1  | 0                                              | ✓ | 1 | 0  | ✓                                              |                                                        | 3 | 1                                                      | ✓ |   |   |
| → $(3_{\bar{1}}^-2)$<br>0/2                    | 1 | 1 | ✓  | 1                                              | 1 | ✓ | 1  | 1                                              | ✓ | 1 | 1  | ✓                                              | $(4_1^+0) \rightarrow (1_{\bar{1}}^-0)$<br>4/5         | 3 | 2                                                      | ✓ |   |   |
|                                                | 1 | 0 | ✓  | 2                                              | 0 | × | 2  | 0                                              | ✓ | 2 | 0  | ✓                                              |                                                        | 4 | 0                                                      | ✓ |   |   |
| → $(4_1^+2)$<br>0/2                            | 1 | 0 | ✓  | 2                                              | 1 | ✓ | 2  | 1                                              | ✓ | 2 | 1  | ✓                                              | → $(1_{\bar{1}}^-2)$<br>1/5                            | 4 | 0                                                      | ✓ |   |   |
|                                                | 1 | 1 | ✓  | 2                                              | 2 | ✓ | 2  | 2                                              | ✓ | 2 | 2  | ✓                                              |                                                        | 4 | 1                                                      | ✓ |   |   |
| → $(4_{\bar{1}}^-2)$<br>0/2                    | 1 | 0 | ✓  | 3                                              | 0 | ✓ | 3  | 0                                              | ✓ | 3 | 0  | ✓                                              | $(4_{\bar{1}}^-0) \rightarrow (1_{\bar{1}}^-0)$<br>3/5 | 4 | 2                                                      | × |   |   |
|                                                | 1 | 1 | ✓  | 3                                              | 1 | ✓ | 3  | 1                                              | ✓ | 3 | 1  | ✓                                              |                                                        | 4 | 3                                                      | × |   |   |
| $(1_1^+2) \rightarrow (1_{\bar{1}}^-0)$<br>5/9 | 1 | 1 | ✓  | 3                                              | 2 | ✓ | 3  | 2                                              | ✓ | 3 | 2  | ✓                                              | → $(1_{\bar{1}}^-2)$<br>1/5                            | 4 | 4                                                      | × |   |   |
|                                                | 1 | 0 | ×  | 3                                              | 3 | × | 3  | 3                                              | ✓ | 3 | 3  | ✓                                              |                                                        | 4 | 0                                                      | ✓ |   |   |
|                                                | 1 | 1 | ✓  | 1                                              | 0 | × | 1  | 0                                              | ✓ | 1 | 0  | ✓                                              |                                                        | 4 | 1                                                      | ✓ |   |   |
|                                                | 1 | 1 | ✓  | 1                                              | 1 | ✓ | 1  | 1                                              | ✓ | 1 | 1  | ✓                                              |                                                        | 4 | 2                                                      | ✓ |   |   |
|                                                | 2 | 0 | ✓  | 2                                              | 0 | ✓ | 2  | 0                                              | ✓ | 2 | 0  | ✓                                              |                                                        | 4 | 3                                                      | × |   |   |
|                                                | 2 | 1 | ✓  | 2                                              | 1 | ✓ | 2  | 1                                              | ✓ | 2 | 1  | ✓                                              |                                                        | 4 | 4                                                      | × |   |   |
| → $(1_{\bar{1}}^-2)$<br>0/9                    | 2 | 2 | ×  | 2                                              | 2 | ✓ | 2  | 2                                              | ✓ | 2 | 2  | ✓                                              | → $(1_{\bar{1}}^-2)$<br>1/5                            | 4 | 0                                                      | ✓ |   |   |
|                                                | 3 | 0 | ×  | 3                                              | 0 | × | 3  | 0                                              | ✓ | 3 | 0  | ✓                                              |                                                        | 4 | 1                                                      | ✓ |   |   |
|                                                | 3 | 1 | ✓  | 3                                              | 1 | ✓ | 3  | 1                                              | ✓ | 3 | 1  | ✓                                              |                                                        | 4 | 2                                                      | ✓ |   |   |
|                                                | 3 | 2 | ×  | 3                                              | 2 | ✓ | 3  | 2                                              | ✓ | 3 | 2  | ✓                                              |                                                        | 4 | 3                                                      | × |   |   |
|                                                | 3 | 3 | ×  | 3                                              | 3 | ✓ | 3  | 3                                              | ✓ | 3 | 3  | ✓                                              |                                                        | 4 | 4                                                      | × |   |   |
|                                                | 3 | 3 | ×  | 1                                              | 0 | ✓ | 1  | 0                                              | ✓ | 1 | 0  | ✓                                              |                                                        | 4 | 0                                                      | ✓ |   |   |
| → $(3_{\bar{1}}^-0)$<br>1/9                    | 2 | 0 | ✓  | 1                                              | 1 | ✓ | 1  | 1                                              | ✓ | 1 | 1  | ✓                                              | → $(1_{\bar{1}}^-2)$<br>1/5                            | 4 | 1                                                      | ✓ |   |   |
|                                                | 2 | 1 | ✓  | 2                                              | 0 | × | 2  | 0                                              | ✓ | 2 | 0  | ✓                                              |                                                        | 4 | 2                                                      | ✓ |   |   |
|                                                | 2 | 2 | ✓  | 2                                              | 1 | ✓ | 2  | 1                                              | ✓ | 2 | 1  | ✓                                              |                                                        | 4 | 3                                                      | × |   |   |
|                                                | 3 | 0 | ×  | 2                                              | 2 | ✓ | 2  | 2                                              | ✓ | 2 | 2  | ✓                                              |                                                        | 4 | 4                                                      | × |   |   |
|                                                | 3 | 1 | ✓  | 3                                              | 0 | ✓ | 3  | 0                                              | ✓ | 3 | 0  | ✓                                              |                                                        | 4 | 0                                                      | ✓ |   |   |
|                                                | 3 | 2 | ✓  | 3                                              | 1 | ✓ | 3  | 1                                              | ✓ | 3 | 1  | ✓                                              |                                                        | 4 | 1                                                      | ✓ |   |   |
|                                                | 3 | 3 | ✓  | 3                                              | 2 | ✓ | 3  | 2                                              | ✓ | 3 | 2  | ✓                                              |                                                        | 4 | 2                                                      | ✓ |   |   |
|                                                | 3 | 3 | ✓  | 3                                              | 3 | ✓ | 3  | 3                                              | ✓ | 3 | 3  | ✓                                              |                                                        | 4 | 3                                                      | ✓ |   |   |
|                                                | 3 | 3 | ✓  | 1                                              | 0 | × | 1  | 0                                              | ✓ | 1 | 0  | ✓                                              |                                                        | 4 | 4                                                      | × |   |   |
| 3                                              | 3 | ✓ | 1  | 1                                              | ✓ | 1 | 1  | ✓                                              | 1 | 1 | ✓  | 4                                              | 0                                                      | ✓ |                                                        |   |   |   |
| → $(4_1^+0)$<br>2/9                            | 2 | 0 | ✓  | 2                                              | 0 | × | 2  | 0                                              | ✓ | 2 | 0  | ✓                                              | → $(1_{\bar{1}}^-2)$<br>1/5                            | 4 | 1                                                      | ✓ |   |   |
|                                                | 2 | 1 | ✓  | 2                                              | 1 | ✓ | 2  | 1                                              | ✓ | 2 | 1  | ✓                                              |                                                        | 4 | 2                                                      | ✓ |   |   |
|                                                | 2 | 2 | ✓  | 2                                              | 2 | ✓ | 2  | 2                                              | ✓ | 2 | 2  | ✓                                              |                                                        | 4 | 3                                                      | × |   |   |
|                                                | 3 | 0 | ×  | 3                                              | 0 | × | 3  | 0                                              | ✓ | 3 | 0  | ✓                                              |                                                        | 4 | 4                                                      | × |   |   |
|                                                | 3 | 1 | ✓  | 3                                              | 1 | ✓ | 3  | 1                                              | ✓ | 3 | 1  | ✓                                              |                                                        | 4 | 0                                                      | ✓ |   |   |
|                                                | 3 | 2 | ✓  | 3                                              | 2 | ✓ | 3  | 2                                              | ✓ | 3 | 2  | ✓                                              |                                                        | 4 | 1                                                      | ✓ |   |   |
|                                                | 3 | 3 | ✓  | 3                                              | 3 | ✓ | 3  | 3                                              | ✓ | 3 | 3  | ✓                                              |                                                        | 4 | 2                                                      | ✓ |   |   |
|                                                | 3 | 3 | ✓  | 1                                              | 0 | ✓ | 1  | 0                                              | ✓ | 1 | 0  | ✓                                              |                                                        | 4 | 3                                                      | ✓ |   |   |
|                                                | 3 | 3 | ✓  | 1                                              | 1 | ✓ | 1  | 1                                              | ✓ | 1 | 1  | ✓                                              |                                                        | 4 | 4                                                      | × |   |   |
| 3                                              | 3 | ✓ | 2  | 0                                              | × | 2 | 0  | ✓                                              | 2 | 0 | ✓  | 4                                              | 0                                                      | ✓ |                                                        |   |   |   |
| → $(4_{\bar{1}}^-0)$<br>1/9                    | 2 | 1 | ✓  | 2                                              | 1 | ✓ | 2  | 1                                              | ✓ | 2 | 1  | ✓                                              | → $(1_{\bar{1}}^-2)$<br>1/5                            | 4 | 1                                                      | ✓ |   |   |
|                                                | 2 | 2 | ✓  | 2                                              | 2 | ✓ | 2  | 2                                              | ✓ | 2 | 2  | ✓                                              |                                                        | 4 | 2                                                      | ✓ |   |   |
|                                                | 3 | 0 | ×  | 3                                              | 0 | × | 3  | 0                                              | ✓ | 3 | 0  | ✓                                              |                                                        | 4 | 3                                                      | ✓ |   |   |
|                                                | 3 | 1 | ✓  | 3                                              | 1 | ✓ | 3  | 1                                              | ✓ | 3 | 1  | ✓                                              |                                                        | 4 | 4                                                      | × |   |   |
|                                                | 3 | 2 | ✓  | 3                                              | 2 | ✓ | 3  | 2                                              | ✓ | 3 | 2  | ✓                                              |                                                        | 4 | 0                                                      | ✓ |   |   |
|                                                | 3 | 3 | ✓  | 3                                              | 3 | ✓ | 3  | 3                                              | ✓ | 3 | 3  | ✓                                              |                                                        | 4 | 1                                                      | ✓ |   |   |
|                                                | 3 | 3 | ✓  | 1                                              | 0 | ✓ | 1  | 0                                              | ✓ | 1 | 0  | ✓                                              |                                                        | 4 | 2                                                      | ✓ |   |   |
|                                                | 3 | 3 | ✓  | 1                                              | 1 | ✓ | 1  | 1                                              | ✓ | 1 | 1  | ✓                                              |                                                        | 4 | 3                                                      | ✓ |   |   |
|                                                | 3 | 3 | ✓  | 2                                              | 0 | × | 2  | 0                                              | ✓ | 2 | 0  | ✓                                              |                                                        | 4 | 4                                                      | × |   |   |
| 3                                              | 3 | ✓ | 2  | 1                                              | ✓ | 2 | 1  | ✓                                              | 2 | 1 | ✓  | 4                                              | 0                                                      | ✓ |                                                        |   |   |   |



**Table S1: Continued**

| Transition                              | j                              | m | PD | Transition                               | j | m | PD | Transition                               | j | m | PD | Transition                               | j | m | PD | Transition                               | j | m | PD |   |   |   |   |   |   |
|-----------------------------------------|--------------------------------|---|----|------------------------------------------|---|---|----|------------------------------------------|---|---|----|------------------------------------------|---|---|----|------------------------------------------|---|---|----|---|---|---|---|---|---|
| $(2_1^+2) \rightarrow (1_1^-0)$<br>9/15 | 0                              | 0 | x  | $(3_1^+2) \rightarrow (1_1^-0)$<br>13/20 | 1 | 0 | x  | $(3_1^-2) \rightarrow (1_1^-0)$<br>12/20 | 1 | 0 | ✓  | $(4_1^+2) \rightarrow (1_1^-0)$<br>18/20 | 2 | 0 | x  | $(4_1^-2) \rightarrow (1_1^-0)$<br>17/20 | 2 | 0 | ✓  |   |   |   |   |   |   |
|                                         | 1                              | 0 | ✓  |                                          | 1 | 1 | ✓  |                                          | 1 | 1 | ✓  |                                          | 2 | 1 | ✓  |                                          | 2 | 1 | ✓  | 2 | 1 | ✓ |   |   |   |
|                                         | 1                              | 1 | ✓  |                                          | 2 | 0 | ✓  |                                          | 2 | 0 | x  |                                          | 2 | 0 | x  |                                          | 2 | 2 | x  | 2 | 2 | x | 2 | 2 | x |
|                                         | 2                              | 0 | x  |                                          | 2 | 1 | ✓  |                                          | 2 | 1 | ✓  |                                          | 2 | 1 | ✓  |                                          | 3 | 0 | ✓  | 3 | 0 | x | 3 | 0 | x |
|                                         | 2                              | 1 | ✓  |                                          | 2 | 2 | x  |                                          | 2 | 2 | x  |                                          | 2 | 2 | x  |                                          | 3 | 1 | ✓  | 3 | 1 | ✓ | 3 | 1 | ✓ |
|                                         | 2                              | 2 | x  |                                          | 3 | 0 | x  |                                          | 3 | 0 | ✓  |                                          | 3 | 0 | ✓  |                                          | 3 | 2 | x  | 3 | 2 | x | 3 | 2 | x |
|                                         | 3                              | 0 | ✓  |                                          | 3 | 1 | ✓  |                                          | 3 | 1 | ✓  |                                          | 3 | 1 | ✓  |                                          | 3 | 3 | x  | 3 | 3 | x | 3 | 3 | x |
|                                         | 3                              | 1 | ✓  |                                          | 3 | 2 | x  |                                          | 3 | 2 | x  |                                          | 3 | 2 | x  |                                          | 4 | 0 | ✓  | 4 | 0 | ✓ | 4 | 0 | ✓ |
|                                         | 3                              | 2 | x  |                                          | 3 | 3 | x  |                                          | 3 | 3 | x  |                                          | 3 | 3 | x  |                                          | 4 | 1 | ✓  | 4 | 1 | ✓ | 4 | 1 | ✓ |
|                                         | 4                              | 0 | x  |                                          | 4 | 0 | ✓  |                                          | 4 | 0 | x  |                                          | 4 | 0 | x  |                                          | 4 | 2 | x  | 4 | 2 | x | 4 | 2 | x |
|                                         | 4                              | 1 | ✓  |                                          | 4 | 1 | ✓  |                                          | 4 | 1 | ✓  |                                          | 4 | 1 | ✓  |                                          | 4 | 3 | x  | 4 | 3 | x | 4 | 3 | x |
|                                         | 4                              | 2 | x  |                                          | 4 | 2 | x  |                                          | 4 | 2 | x  |                                          | 4 | 2 | x  |                                          | 4 | 4 | x  | 4 | 4 | x | 4 | 4 | x |
|                                         | 4                              | 3 | x  |                                          | 4 | 3 | x  |                                          | 4 | 3 | x  |                                          | 4 | 3 | x  |                                          | 5 | 0 | ✓  | 5 | 0 | x | 5 | 0 | x |
|                                         | 4                              | 4 | x  |                                          | 4 | 4 | x  |                                          | 4 | 4 | x  |                                          | 4 | 4 | x  |                                          | 5 | 1 | ✓  | 5 | 1 | ✓ | 5 | 1 | ✓ |
|                                         | 4                              | 4 | x  |                                          | 5 | 0 | x  |                                          | 5 | 0 | x  |                                          | 5 | 0 | ✓  |                                          | 5 | 2 | x  | 5 | 2 | x | 5 | 2 | x |
| $\rightarrow (1_1^-2)$<br>1/15          | 0                              | 0 | ✓  | $\rightarrow (1_1^-2)$<br>3/20           | 5 | 1 | ✓  | $\rightarrow (1_1^-2)$<br>3/20           | 5 | 1 | ✓  | $\rightarrow (1_1^-2)$<br>6/25           | 5 | 3 | x  | $\rightarrow (1_1^-2)$<br>6/25           | 5 | 3 | x  |   |   |   |   |   |   |
|                                         | 1                              | 0 | ✓  |                                          | 5 | 2 | x  |                                          | 5 | 2 | x  |                                          | 5 | 4 | x  |                                          | 5 | 4 | x  | 5 | 4 | x |   |   |   |
|                                         | 1                              | 1 | ✓  |                                          | 5 | 3 | x  |                                          | 5 | 3 | x  |                                          | 5 | 5 | x  |                                          | 5 | 5 | x  | 5 | 5 | x |   |   |   |
|                                         | 2                              | 0 | ✓  |                                          | 5 | 4 | x  |                                          | 5 | 4 | x  |                                          | 6 | 0 | x  |                                          | 6 | 0 | ✓  | 6 | 0 | ✓ |   |   |   |
|                                         | 2                              | 1 | ✓  |                                          | 5 | 5 | x  |                                          | 5 | 5 | x  |                                          | 6 | 1 | ✓  |                                          | 6 | 1 | ✓  | 6 | 1 | ✓ |   |   |   |
|                                         | 2                              | 2 | ✓  |                                          | 1 | 0 | ✓  |                                          | 1 | 0 | ✓  |                                          | 6 | 2 | x  |                                          | 6 | 2 | x  | 6 | 2 | x |   |   |   |
|                                         | 3                              | 0 | ✓  |                                          | 1 | 1 | ✓  |                                          | 1 | 1 | ✓  |                                          | 6 | 3 | x  |                                          | 6 | 3 | x  | 6 | 3 | x |   |   |   |
|                                         | 3                              | 1 | ✓  |                                          | 2 | 0 | ✓  |                                          | 2 | 0 | ✓  |                                          | 6 | 4 | x  |                                          | 6 | 4 | x  | 6 | 4 | x |   |   |   |
|                                         | 3                              | 2 | ✓  |                                          | 2 | 1 | ✓  |                                          | 2 | 1 | ✓  |                                          | 6 | 5 | x  |                                          | 6 | 5 | x  | 6 | 5 | x |   |   |   |
|                                         | 4                              | 0 | ✓  |                                          | 2 | 2 | ✓  |                                          | 2 | 2 | ✓  |                                          | 6 | 6 | x  |                                          | 6 | 6 | x  | 6 | 6 | x |   |   |   |
|                                         | 4                              | 1 | ✓  |                                          | 3 | 0 | ✓  |                                          | 3 | 0 | ✓  |                                          | 2 | 0 | ✓  |                                          | 2 | 0 | ✓  | 2 | 0 | ✓ |   |   |   |
|                                         | 4                              | 2 | ✓  |                                          | 3 | 1 | ✓  |                                          | 3 | 1 | ✓  |                                          | 2 | 1 | ✓  |                                          | 2 | 1 | ✓  | 2 | 1 | ✓ |   |   |   |
|                                         | 4                              | 3 | ✓  |                                          | 3 | 2 | ✓  |                                          | 3 | 2 | ✓  |                                          | 2 | 2 | ✓  |                                          | 2 | 2 | ✓  | 2 | 2 | ✓ |   |   |   |
|                                         | 4                              | 4 | x  |                                          | 3 | 3 | ✓  |                                          | 3 | 3 | ✓  |                                          | 3 | 0 | ✓  |                                          | 3 | 0 | ✓  | 3 | 0 | ✓ |   |   |   |
|                                         | 4                              | 4 | x  |                                          | 4 | 0 | ✓  |                                          | 4 | 0 | ✓  |                                          | 3 | 1 | ✓  |                                          | 3 | 1 | ✓  | 3 | 1 | ✓ |   |   |   |
| 4                                       | 4                              | x | 4  | 1                                        | ✓ | 4 | 1  | ✓                                        | 3 | 2 | ✓  | 3                                        | 2 | ✓ | 3  | 2                                        | ✓ |   |    |   |   |   |   |   |   |
| $(2_1^-2) \rightarrow (1_1^-0)$<br>8/15 | 1                              | 0 | x  | 4                                        | 2 | ✓ | 4  | 2                                        | ✓ | 4 | 0  | ✓                                        | 4 | 0 | ✓  | 4                                        | 0 | ✓ |    |   |   |   |   |   |   |
|                                         | 1                              | 1 | ✓  | 4                                        | 3 | ✓ | 4  | 3                                        | ✓ | 4 | 1  | ✓                                        | 4 | 1 | ✓  | 4                                        | 1 | ✓ |    |   |   |   |   |   |   |
|                                         | 2                              | 0 | ✓  | 4                                        | 4 | x | 4  | 4                                        | x | 4 | 2  | ✓                                        | 4 | 2 | ✓  | 4                                        | 2 | ✓ |    |   |   |   |   |   |   |
|                                         | 2                              | 1 | ✓  | 5                                        | 0 | ✓ | 5  | 0                                        | ✓ | 4 | 3  | ✓                                        | 4 | 3 | ✓  | 4                                        | 3 | ✓ |    |   |   |   |   |   |   |
|                                         | 2                              | 2 | x  | 5                                        | 1 | ✓ | 5  | 1                                        | ✓ | 4 | 4  | x                                        | 4 | 4 | x  | 4                                        | 4 | x |    |   |   |   |   |   |   |
|                                         | 3                              | 0 | x  | 5                                        | 2 | ✓ | 5  | 2                                        | ✓ | 5 | 0  | ✓                                        | 5 | 0 | ✓  | 5                                        | 0 | ✓ |    |   |   |   |   |   |   |
|                                         | 3                              | 1 | ✓  | 5                                        | 3 | ✓ | 5  | 3                                        | ✓ | 5 | 1  | ✓                                        | 5 | 1 | ✓  | 5                                        | 1 | ✓ |    |   |   |   |   |   |   |
|                                         | 3                              | 2 | x  | 5                                        | 4 | x | 5  | 4                                        | x | 5 | 2  | ✓                                        | 5 | 2 | ✓  | 5                                        | 2 | ✓ |    |   |   |   |   |   |   |
|                                         | 3                              | 3 | x  | 5                                        | 5 | x | 5  | 5                                        | x | 5 | 3  | ✓                                        | 5 | 3 | ✓  | 5                                        | 3 | ✓ |    |   |   |   |   |   |   |
|                                         | 4                              | 0 | ✓  |                                          |   |   |    |                                          |   | 5 | 4  | x                                        | 5 | 4 | x  | 5                                        | 4 | x |    |   |   |   |   |   |   |
|                                         | 4                              | 1 | ✓  |                                          |   |   |    |                                          |   | 5 | 5  | x                                        | 5 | 5 | x  | 5                                        | 5 | x |    |   |   |   |   |   |   |
|                                         | 4                              | 2 | x  |                                          |   |   |    |                                          |   | 6 | 0  | ✓                                        | 6 | 0 | ✓  | 6                                        | 0 | ✓ |    |   |   |   |   |   |   |
|                                         | 4                              | 3 | x  |                                          |   |   |    |                                          |   | 6 | 1  | ✓                                        | 6 | 1 | ✓  | 6                                        | 1 | ✓ |    |   |   |   |   |   |   |
|                                         | 4                              | 4 | x  |                                          |   |   |    |                                          |   | 6 | 2  | ✓                                        | 6 | 2 | ✓  | 6                                        | 2 | ✓ |    |   |   |   |   |   |   |
|                                         | $\rightarrow (1_1^-2)$<br>1/15 | 0 | 0  | ✓                                        |   |   |    |                                          |   |   |    |                                          |   |   |    |                                          |   |   |    |   |   |   |   |   |   |
| 1                                       |                                | 0 | ✓  |                                          |   |   |    |                                          |   |   |    |                                          |   |   |    |                                          |   |   |    |   |   |   |   |   |   |
| 1                                       |                                | 1 | ✓  |                                          |   |   |    |                                          |   |   |    |                                          |   |   |    |                                          |   |   |    |   |   |   |   |   |   |
| 2                                       |                                | 0 | ✓  |                                          |   |   |    |                                          |   |   |    |                                          |   |   |    |                                          |   |   |    |   |   |   |   |   |   |
| 2                                       |                                | 1 | ✓  |                                          |   |   |    |                                          |   |   |    |                                          |   |   |    |                                          |   |   |    |   |   |   |   |   |   |
| 2                                       |                                | 2 | ✓  |                                          |   |   |    |                                          |   |   |    |                                          |   |   |    |                                          |   |   |    |   |   |   |   |   |   |
| 3                                       |                                | 0 | ✓  |                                          |   |   |    |                                          |   |   |    |                                          |   |   |    |                                          |   |   |    |   |   |   |   |   |   |
| 3                                       |                                | 1 | ✓  |                                          |   |   |    |                                          |   |   |    |                                          |   |   |    |                                          |   |   |    |   |   |   |   |   |   |
| 3                                       |                                | 2 | ✓  |                                          |   |   |    |                                          |   |   |    |                                          |   |   |    |                                          |   |   |    |   |   |   |   |   |   |
| 3                                       |                                | 3 | ✓  |                                          |   |   |    |                                          |   |   |    |                                          |   |   |    |                                          |   |   |    |   |   |   |   |   |   |
| 4                                       |                                | 0 | ✓  |                                          |   |   |    |                                          |   |   |    |                                          |   |   |    |                                          |   |   |    |   |   |   |   |   |   |
| 4                                       |                                | 1 | ✓  |                                          |   |   |    |                                          |   |   |    |                                          |   |   |    |                                          |   |   |    |   |   |   |   |   |   |
| 4                                       |                                | 2 | ✓  |                                          |   |   |    |                                          |   |   |    |                                          |   |   |    |                                          |   |   |    |   |   |   |   |   |   |
| 4                                       |                                | 3 | ✓  |                                          |   |   |    |                                          |   |   |    |                                          |   |   |    |                                          |   |   |    |   |   |   |   |   |   |
| 4                                       |                                | 4 | x  |                                          |   |   |    |                                          |   |   |    |                                          |   |   |    |                                          |   |   |    |   |   |   |   |   |   |

## REFERENCES

1. Varshalovich D. A., Moskalev A. N., Khersonskii V.K. Quantum theory of angular momentum. World scientific; 1988 Oct.
2. Gao, Z., Loreau, J., Van Der Avoird, A. & Van De Meerakker, S. Y. T. Direct observation of product-pair correlations in rotationally inelastic collisions of ND<sub>3</sub> with D<sub>2</sub>. Physical Chemistry Chemical Physics 21, 14033–14041 (2019).
